# Supplementary material
Source: PubMed Central journal article supplement (PMC7606706)
Supplement: NIHMS1617092-supplement-1.pdf [file NIHMS1617092-supplement-1.pdf]

| Figure                    | Cells | Animals | Average                                                                                         | S.E.M.               | Statistics                                                                                                                     |
|---------------------------|-------|---------|-------------------------------------------------------------------------------------------------|----------------------|--------------------------------------------------------------------------------------------------------------------------------|
| Fig. 1e                   | 37    | 8       | 25 $\mu\text{m}$ (n=12): 0.53<br>50 $\mu\text{m}$ (n=9): 0.65<br>>50 $\mu\text{m}$ (n=16): 0.93 | 0.05<br>0.05<br>0.05 | One sample, two sided t-test (p=0.000006)<br>One sample, two sided t-test (p=0.00008)<br>One sample, two sided t-test (p=0.16) |
| Fig 2b ( <i>in vivo</i> ) | 37    | 8       | 0.55 (amp)<br>0.68 (halfwidth)                                                                  | 0.04<br>0.02         |                                                                                                                                |
| Fig 2b (slice)            | 6     | 3       | 0.62 (amp)<br>0.85 (halfwidth)                                                                  | 0.09<br>0.05         |                                                                                                                                |
| Fig. 3c                   | 29    | 20      | 41.92                                                                                           | 3.49                 |                                                                                                                                |
| Fig 3e (-70 mV)           | 14    | 11      | 46.78                                                                                           | 5.46                 | Two-sided paired t-test (p=0.69)                                                                                               |
| (-50 mV)                  | 14    | 11      | 45.33                                                                                           | 5.70                 |                                                                                                                                |
| Fig 3g                    | 14    | 11      | 23.30                                                                                           | 2.75                 |                                                                                                                                |
| Fig 3j (#0)               | 4     | 4       | 43.08                                                                                           | 6.61                 |                                                                                                                                |
| (#1)                      | 5     | 4       | 49.17                                                                                           | 16.61                |                                                                                                                                |
| (#2)                      | 15    | 12      | 40.47                                                                                           | 3.43                 |                                                                                                                                |
| Fig 3k (#0)               | 3     | 3       | 1.99                                                                                            | 0.89                 |                                                                                                                                |
| (#1)                      | 4     | 3       | 5.06                                                                                            | 1.07                 |                                                                                                                                |
| (#2)                      | 3     | 2       | 16.19                                                                                           | 3.9                  |                                                                                                                                |
| Fig 4b (CTL)              | 5     | 3       | 66.37                                                                                           | 8.69                 |                                                                                                                                |
| (NBQX)                    | 5     | 3       | 0                                                                                               | 0                    |                                                                                                                                |
| Fig 4d (Amp, CTL)         | 5     | 3       | 54.86                                                                                           | 7.22                 | Two-sided paired t-test (p=0.02)                                                                                               |
| (Ampt, CTZ)               | 5     | 3       | 77.46                                                                                           | 9.35                 | Two-sided paired t-test (p=0.06)                                                                                               |
| (width, CTL)              | 5     | 3       | 1.21                                                                                            | 0.09                 |                                                                                                                                |
| (width, CTZ)              | 5     | 3       | 1.89                                                                                            | 0.33                 |                                                                                                                                |
| Fig 4g (-70 mV)           | 6     | 5       | -0.61                                                                                           | 0.06                 |                                                                                                                                |
| (+30 mV)                  | 5     | 4       | 0.27                                                                                            | 0.03                 |                                                                                                                                |
| Fig 4j (-70 mV)           | 5     | 3       | 55.43                                                                                           | 3.60                 |                                                                                                                                |
| (+30 mV)                  | 5     | 3       | -24.56                                                                                          | 3.04                 |                                                                                                                                |
| Fig 6c (-50 mV)           | 7     | 3       | -18.10                                                                                          | 1.70                 |                                                                                                                                |
|                           | 7     | 3       | -10.00                                                                                          | 1.64                 |                                                                                                                                |
|                           | 7     | 3       | 23.95                                                                                           | 3.26                 |                                                                                                                                |
|                           | 7     | 3       | 28.80                                                                                           | 3.76                 |                                                                                                                                |
| (-70 mV)                  | 7     | 3       | 13.20                                                                                           | 1.74                 |                                                                                                                                |
|                           | 7     | 3       | 9.06                                                                                            | 1.26                 |                                                                                                                                |
|                           | 7     | 3       | 23.18                                                                                           | 3.00                 |                                                                                                                                |
|                           | 7     | 3       | 27.45                                                                                           | 2.96                 |                                                                                                                                |
| Fig. 6e                   | 7     | 4       | 1.89                                                                                            | 0.06                 |                                                                                                                                |
|                           | 7     | 4       | 1.28                                                                                            | 0.03                 |                                                                                                                                |
|                           | 7     | 4       | 0.56                                                                                            | 0.03                 |                                                                                                                                |
|                           | 7     | 4       | 0.53                                                                                            | 0.42                 |                                                                                                                                |
| Fig 8f PC (Norm FR)       | 13    | 3       | 0.38                                                                                            | 0.10                 |                                                                                                                                |
| DCN                       | 21    | 3       | 5.15                                                                                            | 1.12                 |                                                                                                                                |
| Thalamus                  | 30    | 3       | 1.92                                                                                            | 0.22                 |                                                                                                                                |
| Fig 8g PC (Latency)       | 13    | 3       | 1.99                                                                                            | 0.10                 |                                                                                                                                |
| DCN                       | 21    | 3       | 3.01                                                                                            | 0.18                 |                                                                                                                                |
| Thalamus                  | 30    | 3       | 5.46                                                                                            | 0.29                 |                                                                                                                                |
| Fig 8h PC (Halfwidth)     | 13    | 3       | 1.76                                                                                            | 0.29                 |                                                                                                                                |
| DCN                       | 21    | 3       | 3.52                                                                                            | 0.70                 |                                                                                                                                |
| Thalamus                  | 30    | 3       | 6.23                                                                                            | 0.42                 |                                                                                                                                |
| Extended Fig 3c (off)     | 9     | 2       | 12.32                                                                                           | 3.09                 |                                                                                                                                |
| (on)                      | 9     | 2       | 0                                                                                               | 0                    |                                                                                                                                |
| Extended Fig. 4b          | 37    | 8       | 25 $\mu\text{m}$ (n=12): 1.39<br>50 $\mu\text{m}$ (n=9): 1.38<br>>50 $\mu\text{m}$ (n=16): 1.03 | 0.05<br>0.03<br>0.01 | One sample, two sided t-test (p=0.00002)<br>One sample, two sided t-test (p=0.000001)<br>One sample t-test (p=0.08)            |
